RESEARCH ARTICLE

# Integration of Visual and Olfactory Cues in Host Plant Identification by the Asian Longhorned Beetle, *Anoplophora glabripennis* (Motschulsky) (Coleoptera: Cerambycidae)

Fei L. Yv<sup>1,2</sup>, Xiaoxia Hai<sup>1,2</sup>, Zhigang Wang<sup>1,2\*</sup>, Aihua Yan<sup>1,2</sup>, Bingxiang Liu<sup>1,2</sup>, Yongguo Bi<sup>1,2</sup>

**1** College of Forestry, Agricultural University of Hebei, Baoding, Hebei 071000, P. R. China, **2** Key Laboratories for Germplasm Resources of Forest Trees and Forest Protection of Hebei Province, Baoding 071000, P. R. China

\* [wzhg432@163.com](mailto:wzhg432@163.com)

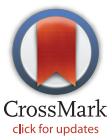

## Abstract

Some insects use host and mate cues, including odor, color, and shape, to locate and recognize their preferred hosts and mates. Previous research has shown that the Asian longhorn beetle, *Anoplophora glabripennis* (Motschulsky), uses olfactory cues to locate host plants and differentiate them from non-host plants. However, whether *A. glabripennis* adults use visual cues or a combination of visual and olfactory cues remains unclear. In this study, we tested the host location and recognition behavior in *A. glabripennis*, which infests a number of hardwood species and causes considerable economic losses in North America, Europe and Asia. We determined the relative importance of visual and olfactory cues from *Acer negundo* in host plant location and recognition, as well as in the discrimination of non-host plants (*Sabina chinensis* and *Pinus bungeana*), by female and male *A. glabripennis*. Visual and olfactory cues from the host plants (*A. negundo*), alone and combined, attracted significantly more females and males than equivalent cues from non-host plants (*S. chinensis* and *P. bungeana*). Furthermore, the combination of visual and olfactory cues of host plants attracted more adults than either cue alone, and visual cues alone attracted significantly more adults than olfactory cues alone. This finding suggests that adult *A. glabripennis* has an innate preference for the visual and/or olfactory cues of its host plants (*A. negundo*) over those of the non-host plant and visual cues are initially more important than olfactory cues for orientation; furthermore, this finding also suggests that adults integrate visual and olfactory cues to find their host plants. Our results indicate that different modalities of host plant cues should be considered together to understand fully the communication between host plants and Asian longhorned beetles.

## OPEN ACCESS

**Citation:** L. Yv F, Hai X, Wang Z, Yan A, Liu B, Bi Y (2015) Integration of Visual and Olfactory Cues in Host Plant Identification by the Asian Longhorned Beetle, *Anoplophora glabripennis* (Motschulsky) (Coleoptera: Cerambycidae). PLoS ONE 10(11): e0142752. doi:10.1371/journal.pone.0142752

**Editor:** Robert Glinwood, Swedish University of Agricultural Sciences, SWEDEN

**Received:** September 5, 2015

**Accepted:** October 26, 2015

**Published:** November 10, 2015

**Copyright:** © 2015 L. Yv et al. This is an open access article distributed under the terms of the [Creative Commons Attribution License](https://creativecommons.org/licenses/by/4.0/), which permits unrestricted use, distribution, and reproduction in any medium, provided the original author and source are credited.

**Data Availability Statement:** All relevant data are within the paper and its Supporting Information files.

**Funding:** This project was supported by the Program of National Natural Science of China (No. C30571501).

**Competing Interests:** The authors have declared that no competing interests exist.

## Introduction

Phytophagous insects discriminate and recognize host plants and mates based on multiple cues, such as odor (olfactory cues), color, size and shape (visual cues) [1–6]. Compared with either visual or olfactory stimuli alone, combined visual and olfactory stimuli may enhance the accuracy of discriminating host from non-host plants and mates from non-mates. Indeed, many insects have been shown to respond synergistically to host plants and mates via visual, olfactory and tactile sensory modes [7–10]. For example, the combination of visual and olfactory cues of host plants was more attractive than either cue alone for foraging-naïve and foraging-experienced bees [6,11,12]. In addition, the white spotted longicorn beetle, *Anoplophora malasiaca*, uses both olfactory and visual cues to locate and recognize mates at medium to short distances [5,13].

The longicorn beetles comprise more than 35,000 species in approximately 4,000 genera, and many species are important pests of forest, plantation, shelter forest and urban trees. Their host plants include hardwoods, coniferous trees, live trees and dying or dead wood [14]. Such highly variable host plants must lead to tremendous variety in the host- and mate-searching behavior and ecology of these pests. For example, contact pheromones are critical in mate location and recognition in some longicorn beetle species (e.g., *Neoclytus mucronatus*, *Megacyllene caryae*, *Megacyllene robiniae* and *Plectrodera scalator*) [15]. Tactile, visual and olfactory cues were used by adult *A. glabripennis* to locate and recognize their preferred mates [16–20]. Thus, some longicorn beetles utilize visual, olfactory or other cues, singly or combined, to find and recognize their mates.

In contrast to mate location, the interaction of visual and olfactory cues for host plant location and recognition by longicorn beetles has received very little attention. Olfactory cues used by adult *A. glabripennis* to locate and recognize host plants have been described in previous research. For example, adult *A. glabripennis* were significantly attracted by volatile organic compounds (VOCs) emitted from maple trees, and *Acer negundo* and *Acer mono* were superior to *Acer truncatum* and *Acer platanoides* for attracting adult *A. glabripennis* [21,22]. However, a detailed report concerning the roles of visual cues in the location and recognition of host and non-host plants has still not been published; in addition, the relative importance of visual and olfactory cues for host plant location and discrimination of non-host plants at long distances and close range in adult *A. glabripennis* has not been clarified.

In this study, we tested the behavioral responses of female and male *A. glabripennis* to host plant (*A. negundo*) location and the discrimination of non-host plants (*Sabina chinensis* and *Pinus bungeana*) as well as the relative importance of visual and olfactory cues of host plants in location and recognition behavior at an 80 cm range. In North America, Europe and China, *Acer* is the most commonly infested tree genus, followed by *Aesculus*, *Alnus*, *Betula*, *Salix*, and *Populus* [23–25]. Notably, 70 000 *A. negundo* were attacked by *A. glabripennis* in a single year (2004) in Harbin, a city in northern China [26]. In addition, Gaag et al. (2014) reported that *A. negundo* was the only tree species infested by *A. glabripennis*, although many susceptible host plants, including *A. mono*, were present in an urban park in Harbin in August 2012 [27]. *A. glabripennis* was not reported to forage on twigs or leaves or lay eggs on any tissue of coniferous species such as *S. chinensis* or *P. bungeana* [23,25,27]. Therefore, we selected *A. negundo* as the host plant and *S. chinensis* and *P. bungeana* as the non-host plants to test the effects of visual and/or olfactory plant cues for host location and recognition by adult *A. glabripennis*.

We performed bioassays with *A. glabripennis* females and males that were never exposed to *A. negundo* or *S. chinensis* and *P. bungeana* wood before use in our experiments (i) to test the hypothesis that female and male *A. glabripennis* have an innate preference for the visual and/or olfactory cues of host plants (*A. negundo*) over those of the non-host plants (*S. chinensis* and *P.*

*bungeana*), (ii) to determine the relative importance of visual and olfactory cues of *A. negundo* for host plant location and recognition, and (iii) to compare the attractiveness of either visual or olfactory cues of *A. negundo* with the combination of visual and olfactory cues. We hypothesized that female and male *A. glabripennis* utilize both visual and olfactory cues, rather than olfactory cues alone [21,22], to find and recognize host plants, and we expected *A. glabripennis* to prefer the cues of *A. negundo* to those of *S. chinensis* and *P. bungeana*.

## Materials and Methods

### Insects

Newly emerged female and male *A. glabripennis* were obtained from the Agricultural University of Hebei in Baoding, Hebei Province, China, on *Salix matsudana* cv. *Umbraculifera* Rehd and *Salix babylonica*, in early July and late August 2015. The insects were kept in rearing cages (diameter 24 cm, height 22 cm) at a density of approximately 6 individuals (3 females and 3 males) per cage. The temperature was maintained at  $27\pm 1^\circ\text{C}$  with  $60\pm 10\%$  relative humidity. Gauze netting (nylon, 16–20 mesh) was placed above the cages to prevent escape. The insects were provided water in moist cotton balls placed on the gauze netting and were fed on fresh branches of *S. babylonica* which were renewed every 2 days. Adults were starved for approximately 24 hours before use in behavioral experiments. All adults were used 15–25 days after emergence because mating and oviposition normally occur during this period [28–30].

### Plants

*A. negundo*, *S. chinensis* and *P. bungeana* were grown on the western campus of the Agricultural University of Hebei. *A. negundo* is a deciduous tree that has green leaves from June to September in Baoding, Hebei, China, and *S. chinensis* and *P. bungeana* are evergreen coniferous trees. Cut branches with green leaves of *A. negundo*, *S. chinensis* and *P. bungeana* were collected in the western campus of Agricultural University of Hebei, Baoding, China. Cut edges of branches were covered moist cotton balls. New plant material was collected before each 10 trials with single beetles [31–33]. All plant material used in this study comprised branches approximately one year old and 20 cm long with green leaves, but the host and non-host species exhibit substantial differences in leaf shape.

### The behavior bioassay chamber

From early July to the end of August 2015, the responses of adult *A. glabripennis* to visual and/or olfactory cues of the host (*A. negundo*) and non-host plants (*S. chinensis* and *P. bungeana*) were studied in the behavior bioassay chamber in the laboratory (Fig 1). The behavior bioassay chamber consisted of an activity I-tube arena that provided space for the activity of *A. glabripennis*, two storage chambers into which host or non-host plants were placed to provide visual and/or olfactory cues for *A. glabripennis*, a gas supply device, and polytetrafluoroethylene (ptfe; Teflon) tubing (diameter = 8 mm) [11,34]. The activity I-tube arena was 80 cm long $\times$ 20 cm diameter; the storage chambers were 20 cm long $\times$ 30 cm high $\times$ 30 cm wide. The ptfе-tube air entry port in the I-tube arena tail end opened into the I-tube, and the ptfе tube air egress port was made into a circular ring and had 8 holes (approximately 2 mm diameter) opened to the center; and then transparent glass caps were used to prevent air outflow in the two ends of I-tube. Two storage chambers and the activity I-tube were connected together when testing the responses of insects. The system was set up as follows for the various experiments. We used 3 different types of storage chamber as the behavior bioassay chamber to provide the host and non-host plant cues, including visual, olfactory, and combined visual and olfactory cues. 1) For

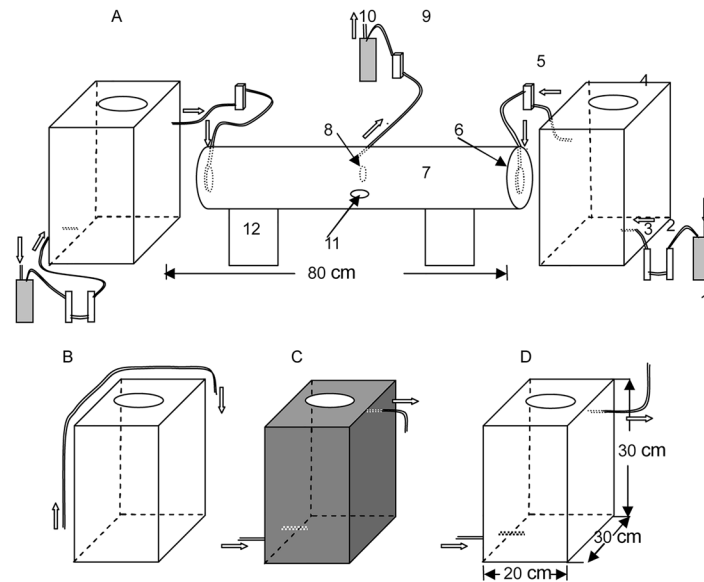

**Fig 1. Schematic representation of the behavior bioassay chamber used to test the attraction of *A. glabripennis* females and males to visual and/or olfactory cues.** (A) host plants and non-host plants cue chambers and test arena; 1, air sampler; 2, glass column with distilled water; 3, glass filter with activated charcoal; 4, one of storage chambers; 5, gas flow meter; 6, air access port of teflon tube; 7, I-tube arena; 8, air exit port of teflon tube; 9, gas flow meter; 10, air sampler; 11, access/exit port of test insects; 12, concave bracing column; the hollow arrows indicate the air flow (300 mL/min) generated with an atmospheric sampling instrument. The storage chambers that provided visual (B), olfactory (C), and visual + olfactory (D) cues of host plants, non-host plants and the blank control for *A. glabripennis* females and males.

doi:10.1371/journal.pone.0142752.g001

olfactory cues alone (Fig 1C), a layer of black paperboard was placed within the storage chamber to obstruct the visual cues of host and non-host plants. Air containing host or non-host plants' volatiles from the storage chamber (300 mL/min) was blown out by an atmospheric sampling instrument (Model: QC-2, BMILP Science and Technology Development Co., Ltd., Beijing, China). 2) For visual cues alone, we used a transparent storage chamber (Fig 1B), purified air directly into a gas flow meter and the arena, bypassing the plant odor chamber (300 mL/min). 3) For the combination of visual and olfactory cues, we used a transparent storage chamber (Fig 1D). The plant odors were blown from the storage chamber as described for the olfactory cues alone. After five trials with a single female or male, the I-tube arena was cleaned with water and then with pure ethanol [35,36]. The holes (10 cm diameter) on the top of the storage chamber, through which the host and non-host plants were introduced, were sealed with odorless plastic wrap, and then petroleum jelly and quartz glass (15 cm long×15 cm wide) were added over the plastic wrap to prevent the release of green leaf odor after two branches with green leaves were placed in the storage chambers. In addition, light was provided by two LED lights (White LED: LED12WE27CD, 220–240 V, 50 Hz, Philips Holland, Shenzhen, China), approximately 1500–2000 lx, mounted at equal distances and 40 cm heights above the behavior chamber to provide homogeneous lighting. All tests took place in a windowless laboratory.

## Behavior experiments

Two-choice bioassays were conducted to test whether *A. glabripennis* has an innate preference for the visual and olfactory cues (alone and combined) of its host plants over those of non-host

plants, as well as to determine the relative importance of single and combined visual and olfactory cues for host plant location at an 80 cm range.

**Experiment 1: visual and/or olfactory cues of host versus non-host plants.** In two-choice bioassays, we offered a choice of host versus non-host plants, with 3 different types of cues (visual, olfactory, visual + olfactory), to *A. glabripennis*. Experiment 1.1: (i) visual cues of *A. negundo* vs. *S. chinensis*, (ii) olfactory cues of *A. negundo* vs. *S. chinensis*, and (iii) visual + olfactory cues of *A. negundo* vs. *S. chinensis*. Experiment 1.2: (i) visual cues of *A. negundo* vs. *P. bungeana*, (ii) olfactory cues of *A. negundo* vs. *P. bungeana*, and (iii) visual + olfactory cues of *A. negundo* vs. *P. bungeana*.

**Experiment 2: the relative importance of visual or olfactory cues of host plants.** To determine the behavioral responses of *A. glabripennis* to visual and olfactory cues of host plants alone and in combination, we conducted 9 different two-choice bioassays. The two-choice bioassays were performed in the following order:

Experiment 2.0: To remove the visual stimulus of the host plant while retaining the odor stimulus, we used black paper to cover the insides of the storage chamber containing the host plant. To ensure that the black paper did not affect beetle behavior, we conducted the following bioassays: (i) black paper vs. blank control, (ii) white paper vs. blank control, (iii) black paper + host plant odor vs. blank control (transparent box) without plants (no visual stimuli of the plant) + air flow of the host plant odor;

Experiment 2.1: (i) visual cue vs. blank control, (ii) olfactory cue vs. blank control, (iii) visual + olfactory cues vs. blank control;

Experiment 2.2: (i) visual cue vs. olfactory cue, (ii) visual cue vs. visual + olfactory cues, (iii) olfactory cue vs. visual + olfactory cues.

## Bioassay protocol

The behavior bioassays were performed between 9:00 and 18:00, when the *A. glabripennis* adults were most active. Each bioassay replicate lasted 10 min or until the beetle made contact with one of the ends of the I-tube chamber and remained there for more than 10 s, and the paired stimuli (visual and/or olfactory cues of host and non-host plants) were arranged 80 cm (the length of the active chamber) apart. The behavioral responses of the female and male *A. glabripennis* were recorded as follows: A single test insect was placed in the center of the activity chamber, and the clock was started. (1) The first distal sector towards which the adult orientated (the distance of movement was at least two the length of test insects, approximately 6 cm); (2) The insect was observed for 10 min or until it made contact with one of the ends of the I-tube chamber; if it stayed there for more than 10 s, we recorded that as its first choice (first visit). Insects that had not made a choice within 10 min were designated as non-responders and excluded from analysis. (3) Latency was defined as the time elapsed between release and the moment at which the adult first made contact with one end of the test chamber and remained there for more than 10 s, i.e., between release and making a first choice; (4) The time during which the adult remained in each wall (referred to as permanence).

## Statistical analysis

Preference for one of the two option cues was evaluated by comparing both the numbers of adults that first orientated towards either option and the number of adults that actually visited them. To assess differences in total beetle responses (first orientated and first visits) between the paired treatments in each two-choice bioassay, observed versus expected chi-square tests were performed. Non-responders were recorded but excluded from analysis. We used 2 x 2 contingency tables (based on behavioral responses obtained from bioassays) to test for

differences in total beetle responses between female and male, and Fisher's Exact tests were used as post hoc tests for the 2 x 2 contingency tables. The responses of male and female *A. glabripennis* were pooled because no obvious differences were found between the two sexes (Fisher's exact tests:  $0.158 < P < 1.000$ ). The latency to the first visit and the time each adult spent (permanence) in each wall to the first contact was compared between two option cues by means of a two-tailed independent-samples Student t-test or Mann-Whitney test if the heteroscedasticity was severe. All statistical analyses were performed using IBM SPSS Statistics 21.00 for Windows (IBM SPSS Inc., Boston, MA, USA) [37].

## Results

### The first series: the visual and/or olfactory cues of host versus non-host plants

In the first experimental series, adult *A. glabripennis* oriented first towards the sector in which contained cues of host plants *A. negundo*. When testing combined cues from *A. negundo* against those of *S. chinensis* and *P. bungeana*, adults oriented more frequently first towards the sector that contained combined cues of host plants *A. negundo* than towards the other sector that contained those of non-host plants, *S. chinensis* and *P. bungeana* (Table 1). The difference in first towards of adult *A. glabripennis* was significant in the visual or olfactory cues of *A. negundo* vs. *S. chinensis*, but no significant differences were found in the visual or olfactory cues of *A. negundo* vs. *P. bungeana* (Table 1).

The pattern of preference as evaluated by adult *A. glabripennis* visitation was similar to that found for orientation (Table 1). Adult *A. glabripennis* showed a clear preference in their total responses for cues of their host plant *A. negundo* over those of non-host plants. Visual and olfactory cues, alone and in combination, of *A. negundo* were significantly more attractive to adults than those of either of the non-host plants, *S. chinensis* and *P. bungeana* (Table 1).

When testing the attractiveness of the visual and olfactory cues, alone and in combination, of *A. negundo* against those of *S. chinensis* and *P. bungeana*, the latency to the first visit and the time each adult spent (permanence) in each wall to the first contact are shown in S1 Table. Both latency and permanence times did not differ between options.

### The second series: the relative importance of visual and olfactory cues of host plants

In experiment 2.0, black and white paper was used to test the responses of adult *A. glabripennis*, we found that white paper were more attractive males than the blank control in the first orientation (Table 2). However, there were no significant differences in attracting adults between black paper and blank control. Similarly, no difference in responses was observed between the black box with holes with odor of *A. negundo* vs. the transparent box with holes without plants but with air flow of the plant odor (Table 2). Therefore, a layer of black paperboard was placed within the storage chamber to obstruct the visual cues of host and non-host plants in experiments 2.1 and 2.2. In experiment 2.1, adult *A. glabripennis* showed similar response patterns in the two-choice bioassays using only host cues, including visual, olfactory, and visual + olfactory cues. Adults initially orientated more frequently towards the sector that contained visual and olfactory cues, alone and in combination, from host plants (*A. negundo*) than towards the other sector (Table 2). In the experiment 2.2, adults orientated more frequently towards the sector that contained a visual or combined cues of *A. negundo* than towards the sector with olfactory cues. However, adults showed no preference between the visual + olfactory and visual cues of *A. negundo* (Table 2).

**Table 1. Number of first orientations and first visits\* by *A. glabripennis* in response to host (*A. negundo*) and non-host (*S. chinensis* and *P. bungeana*) plant cues.**

| Experiment | Type of cue                 | Options offered to ALB | N      |      | First orientations       |            |                  | First visits       |            |                     |
|------------|-----------------------------|------------------------|--------|------|--------------------------|------------|------------------|--------------------|------------|---------------------|
|            |                             |                        | Female | Male | No. of first orientating | % response | $\chi^2 =$       | No. of first visit | % response | $\chi^2 =$          |
| 1.1        | Visual cues                 | <i>A. negundo</i>      | 21     | 16   | 26                       | 100        | $\chi^2 = 6.081$ | 26                 | 84         | $\chi^2 = 14.226$   |
|            |                             | <i>S. chinensis</i>    |        |      | 11                       |            | <b>P = 0.014</b> | 5                  |            | <b>P &lt; 0.001</b> |
|            | Olfactory cues <sup>#</sup> | <i>A. negundo</i>      | 22     | 17   | 28                       | 100        | $\chi^2 = 7.410$ | 30                 | 93         | $\chi^2 = 16.000$   |
|            |                             | <i>S. chinensis</i>    |        |      | 11                       |            | <b>P = 0.006</b> | 6                  |            | <b>P &lt; 0.001</b> |
|            | Visual +olfactory cues      | <i>A. negundo</i>      | 21     | 19   | 27                       | 100        | $\chi^2 = 4.900$ | 31                 | 93         | $\chi^2 = 16.892$   |
|            |                             | <i>S. chinensis</i>    |        |      | 13                       |            | <b>P = 0.027</b> | 6                  |            | <b>P &lt; 0.001</b> |
| 1.2        | Visual cues                 | <i>A. negundo</i>      | 22     | 19   | 26                       | 100        | $\chi^2 = 2.951$ | 32                 | 95         | $\chi^2 = 16.026$   |
|            |                             | <i>P. bungeana</i>     |        |      | 15                       |            | P = 0.086        | 7                  |            | <b>P &lt; 0.001</b> |
|            | Olfactory cues              | <i>A. negundo</i>      | 20     | 20   | 24                       | 100        | $\chi^2 = 1.600$ | 23                 | 83         | $\chi^2 = 5.121$    |
|            |                             | <i>P. bungeana</i>     |        |      | 16                       |            | P = 0.206        | 10                 |            | <b>P = 0.024</b>    |
|            | Visual +olfactory cues      | <i>A. negundo</i>      | 22     | 20   | 29                       | 100        | $\chi^2 = 6.095$ | 33                 | 93         | $\chi^2 = 18.692$   |
|            |                             | <i>P. bungeana</i>     |        |      | 13                       |            | <b>P = 0.014</b> | 6                  |            | <b>P &lt; 0.001</b> |

\*: Preference was assumed when a female or male spent more than 10 s in the one distal wall.

#: Olfactory cues indicate the volatile organic compounds of branches of *A. negundo*, *S. chinensis* or *P. bungeana* with green leaves.

doi:10.1371/journal.pone.0142752.t001

The pattern of preference as evaluated by adult visitation was similar to that found for orientation (Table 2). We found significant differences between white paper and blank control in experiments 2.0, in experiment 2.1 and 2.2 (Table 2). Again, in experiment 2.0, there were no differences in the frequency of visits between the black paper and the blank control, between the black box with holes with the odor of *A. negundo* and the transparent box with holes without plants but with air flow of the plant odor (Table 2).

Similarly, the latency to the first choice and the time each adult spent (permanence) in each wall to the first contact are shown in S2 Table. Males spent significantly more time in the sector that contained a white paper than towards blank control sector in experiment 2.0. But both latency and permanence times did not differ between options in the other experiment.

## Discussion

We found that both female and male *A. glabripennis* can discriminate between visual and olfactory cues of host plants and non-host plants and have a clear preference for the visual and olfactory cues of their host plants (*A. negundo*) over those of non-host plants (*S. chinensis* and *P. bungeana*), both separately and in combination. These findings suggest that the mechanisms for host plant location and recognition by *A. glabripennis* rely on the interaction of visual and olfactory cues rather than either type of cue alone. Previously, distinct cues of host plants had been considered separately to explain the selection of host plants and the avoidance of non-host plants by *A. glabripennis* (see above). Therefore, our findings may reveal new mechanisms by which the interplay between visual and olfactory cues is utilized in host plant location and recognition by some longicorn beetle species.

**Table 2. Number of first orientations and first visits\* by *A. glabripennis* in response to cues from host plant (*A. negundo*), black paper and blank control.**

| Experiment | Type of cue             | Options offered to ALB                      | N      |      | First orientations       |            |                                  | First visits        |            |                                  |
|------------|-------------------------|---------------------------------------------|--------|------|--------------------------|------------|----------------------------------|---------------------|------------|----------------------------------|
|            |                         |                                             | Female | Male | No. of first orientating | % response | $\chi^2$                         | No. of first choice | % response | $\chi^2$                         |
| 2.0        | Visual cues             | Black paper                                 | 28     | 25   | 27                       | 100        | $\chi^2 = 0.019$                 | 20                  | 87         | $\chi^2 = 0.782$                 |
|            |                         | Blank control                               |        |      | 26                       |            | $P = 0.891$                      | 26                  |            | $P = 0.376$                      |
|            |                         | White paper <sup>@</sup>                    | 0      | 21   | 15                       | 100        | $\chi^2 = 3.857$                 | 17                  | 95         | $\chi^2 = 9.800$                 |
|            |                         | Blank control                               |        |      | 6                        |            | <b><math>P = 0.0495</math></b>   | 3                   |            | <b><math>P = 0.002</math></b>    |
|            | Visual + olfactory cues | Black paper + olfactory cues <sup>§</sup>   | 20     | 20   | 21                       | 100        | $\chi^2 = 0.100$                 | 19                  | 93         | $\chi^2 = 0.027$                 |
|            |                         | Blank control + olfactory cues <sup>§</sup> |        |      | 19                       |            | $P = 0.752$                      | 18                  |            | $P = 0.869$                      |
| 2.1        | Visual cues             | <i>A. negundo</i>                           | 20     | 16   | 24                       | 100        | $\chi^2 = 4.000$                 | 26                  | 94         | $\chi^2 = 9.529$                 |
|            |                         | Blank control                               |        |      | 12                       |            | <b><math>P = 0.046</math></b>    | 8                   |            | <b><math>P = 0.002</math></b>    |
|            | Olfactory cues          | <i>A. negundo</i>                           | 21     | 20   | 27                       | 100        | $\chi^2 = 4.122$                 | 29                  | 90         | $\chi^2 = 11.919$                |
|            |                         | Blank control                               |        |      | 14                       |            | <b><math>P = 0.042</math></b>    | 8                   |            | <b><math>P &lt; 0.001</math></b> |
|            | Visual + olfactory cues | <i>A. negundo</i>                           | 19     | 17   | 25                       | 100        | $\chi^2 = 5.444$                 | 29                  | 94         | $\chi^2 = 16.941$                |
|            |                         | Blank control                               |        |      | 11                       |            | <b><math>P = 0.020</math></b>    | 5                   |            | <b><math>P &lt; 0.001</math></b> |
| 2.2        | <i>A. negundo</i>       | Visual cues                                 | 23     | 39   | 38                       | 95         | $\chi^2 = 4.898$                 | 38                  | 90         | $\chi^2 = 7.143$                 |
|            |                         | Olfactory cues                              |        |      | 21                       |            | <b><math>P = 0.027</math></b>    | 18                  |            | <b><math>P = 0.008</math></b>    |
|            | <i>A. negundo</i>       | Visual cues                                 | 24     | 24   | 21                       | 100        | $\chi^2 = 0.750$                 | 13                  | 88         | $\chi^2 = 6.095$                 |
|            |                         | Visual + olfactory cues                     |        |      | 27                       |            | $P = 0.387$                      | 29                  |            | <b><math>P = 0.014</math></b>    |
|            | <i>A. negundo</i>       | Olfactory cues                              | 22     | 22   | 11                       | 100        | $\chi^2 = 11.000$                | 5                   | 89         | $\chi^2 = 21.564$                |
|            |                         | Visual + olfactory cues                     |        |      | 33                       |            | <b><math>P &lt; 0.001</math></b> | 34                  |            | <b><math>P &lt; 0.001</math></b> |

\*: Preference was assumed when a female or male spent more than 10 s in the one distal wall.

<sup>@</sup>: only males were tested in this experiment.

<sup>§</sup>: olfactory cues indicate the volatile organic compounds of branches of *A. negundo* with green leaves.

doi:10.1371/journal.pone.0142752.t002

Adult *A. glabripennis* were attracted by visual cues of host plants over those of non-host plants when olfactory cues were removed. In addition, when we offered a combination of visual and olfactory cues of the host plant, adults showed a stronger preference in response to the combined cues than to either cue alone, and adults were more attracted by visual + olfactory cues of host plants than those of non-host plants. These findings also suggested that the *A. glabripennis* adults not only depend on olfactory cues [21,22] but also on visual cues when searching for host plants. To date, only a few studies have suggested that longicorn beetles have a clear preference for the visual cues (color, shape, etc.) of their host plants, and a trapping experiment performed in the field indicated that this was also the case for *Monoctonus* spp.



and *Xylotrechus longitarsis* [38,39]. However, we found that visual cues from host plants also play an important role in host plant location and recognition among both female and male *A. glabripennis*. In addition, the previous reports stated that adult mating behavior started with visual stimulation of female adults to the male [16,17]. These findings suggest that visual cues from host plants and mates play an important role in the preference host plant and mate location and recognition of *A. glabripennis*.

In our two-choice bioassays, adults oriented more frequently towards the sector that contained visual cues of host plant than towards the sector that contained a host plants' olfactory cues; suggesting that visual cues are initially more important than olfactory cues for orientation at a range of 80 cm. In fact, volatile plant compounds can be highly generalized throughout both host plants and non-host plants [40]. A complex volatile background provided by natural and anthropogenic resources interferes with odor recognition by herbivorous insects, this phenomenon is often suggested as the reason visual cues from host plants are more effective than olfactory ones for long-range signaling [41,42]. However, we cannot exclude the possibility that olfactory cues from host plants might have a function in orientation, because the first orientation of adult *A. glabripennis* was significantly difference to the olfactory cues of *A. negundo* vs. *S. chinensis*; besides adults oriented more frequently towards the sector that contained olfactory cues of host plants than towards the blank control when visual cues were removed. In addition, it has been reported that the six aldehyde compound blend from female were more attractive to males than solvent controls in the Y-tube olfactometer, as well as male-produced pheromone alone or in different combinations with plant volatiles significantly increased trap catches of females in the field [18,43,44].

Our results showed that adult *A. glabripennis* were significantly more attracted to the combined cues than to either cue alone. This finding is the first evidence that multiple cues from host and non-host plants, including at least visual and olfactory cues, can mediate the search for host plants and the discrimination of host from non-host plants by *A. glabripennis* adults. There are very few reports of longicorn beetle species using the interaction of visual and olfactory cues to locate and recognize their preferred host plants or mates [5,13,40]. However, our research also supports the hypothesis that the interaction of visual and olfactory cues is used not only by bees, flies and moths [11,12,45,46] but also by some longicorn beetle species, at least including *A. glabripennis*, *A. malasiaca* [5,13], *X. longitarsis*, *Monochamus scutellatus* and *Monochamus clamator* [40], for the location and recognition of host plants or mates.

The Asian longhorned beetle, *A. glabripennis*, is an economically important invasive pest that has become established in several places in North America and Europe [23], and efforts to develop effective tools for its survey have not been very successful. Both female and male produced long-range sex pheromones attractants for *A. glabripennis* have been reported [18,19,20,43,44,47]. Female *A. glabripennis* cuticular hydrocarbon extracts contain five olefins, (Z)-9-tricosene, (Z)-9-pentacosene, (Z)-7-pentacosene, (Z)-9-heptacosene, and (Z)-7-heptacosene, that elicited copulatory behavior in males in laboratory [19]. In laboratory bioassays, male produce a blend of two functionalized dialkylethers, 4-(*n*-heptyloxy)butanal, 4-(*n*-heptyloxy)butan-1-ol, and (3*E*, 6*E*)- $\alpha$ -farnesene that elicit GC-EAD responses in females [47,48] and are attractive to females, particularly when used with host odors such as (-)-linalool, *trans*-caryophyllene, and (Z)-3-hexen-1-ol [20,44]. Indeed, the male- and female-produced pheromone elicits behavioral responses from females and males in laboratory and field bioassays have demonstrated statistically significant but limited attraction [18,43,44]. In our study, the combined visual and olfactory cues were more attractive than either of the host plant cues alone for adult *A. glabripennis*. Perhaps a multi-component trap, designed to use a combination of visual and semiochemicals cues, will provide an extremely needed new tool for survey, detection and control of this important forest pest, in the same way that combination of visual

and olfactory cues significantly enhanced trap effectiveness for the West Indian sweetpotato weevil, *Euscepes postfasciatus* (Fairmaire) [49].

Understanding the biology, ecology, and behavior of pest insects is essential to produce high-quality trapping tools that ensure the success of control programs. Our results allow a better understanding of the cues used by adult *A. glabripennis* during host searching. Further research should contribute to the identification of the chemical compounds from wounded and intact branches of *A. negundo* involved in the present study and distinction of the chemical compounds of host and non-host plants. Moreover, considering our finding that white paper was more attractive to males than the blank control, whether the other colors can attract adults should be explored. Further research is needed to ascertain adult *A. glabripennis* responses to variations in the combination of the two sensory modalities, such as changes in color and lure dose.

## Supporting Information

**S1 Table. Mean latency and mean permanence times (in seconds) of *A. glabripennis* in response to each cue of host (*A. negundo*) and non-host (*S. chinensis* and *P. bungeana*) plant.**

(DOC)

**S2 Table. Mean latency and mean permanence times (in seconds) of *A. glabripennis* in response to each cue of host plant (*A. negundo*), black paper and the blank control.**

(DOC)

**S3 Table. Relevant data underlying the findings described in the manuscript.**

(DOC)

## Acknowledgments

We are deeply grateful to several anonymous reviewers and Professor Robert Glinwood for their invaluable and insightful comments on an earlier draft of the manuscript. We also thank the Agricultural University of Hebei (Wu Xiaokai, Shen Tengwei, Gen Lin, Wang Jiao, Li Hui, Wang Zhipeng, Cui Bowen, and Fen Dawei) for field assistance and insect collection. This project was supported by the Program of National Natural Science of China (No. 30571501).

## Author Contributions

Conceived and designed the experiments: FL ZW XH. Performed the experiments: FL AY BL. Analyzed the data: FL. Contributed reagents/materials/analysis tools: FL YB AY BL. Wrote the paper: FL XH.

## References

1. Webster B, Bruce T, Pickett J, Hardie J. Volatiles functioning as host cues in a blend become nonhost cues when presented alone to the black bean aphid. *Anim Behav.* 2010; 79: 451–457.
2. Otálora-Luna F, Lapointe SL, Dickens JC. Olfactory cues are subordinate to visual stimuli in a neotropical generalist weevil. *PLoS one.* 2013; 8: e53120. doi: [10.1371/journal.pone.0053120](https://doi.org/10.1371/journal.pone.0053120) PMID: [23341926](https://pubmed.ncbi.nlm.nih.gov/23341926/)
3. Dötterl S, Milchreit K, Schäßler I. Behavioural plasticity and sex differences in host finding of a specialized bee species. *J Comp Physiol A.* 2011; 197: 1119–1126.
4. Kerr JL. Olfactory and visual cues in host finding by bark beetles. M. Sc. Thesis, University of Canterbury. 2010.

5. Fukaya M, Akino T, Yasuda T, Yasui H, Wakamura S. Visual and olfactory cues for mate orientation behaviour in male white-spotted longicorn beetle, *Anoplophora malasiaca*. *Entomol Exp Appl*. 2004; 111: 111–115.
6. Milet-Pinheiro P, Ayasse M, Dötterl S. Visual and olfactory floral cues of *Campanula* (Campanulaceae) and their significance for host recognition by an oligolectic bee pollinator. *PLoS one*. 2015; 10(6): e0128577. PMID: [26060994](#)
7. Fischer S, Samietz J, Wäckers F, Dorn S. Interaction of vibrational and visual cues in parasitoid host location. *J Comp Physiol A*. 2001; 187: 785–791. PMID: [11800035](#)
8. Henneman ML, Dyreson EG, Takabayashi J, Raguso RA. Response to walnut olfactory and visual cues by the parasitic wasp *Diachasmimorpha juglandis*. *J Chem Ecol*. 2002; 28: 2221–2244. PMID: [12523564](#)
9. Zhou ZS, Guo JY, Guo W, Wan FH. Synergistic effects of olfactory and tactile cues in short-range mate finding of *Ophraella communa*. *Entomol Exp Appl*. 2011; 138: 48–54.
10. Lu W, Wang Q, Tian MY, He XZ, Zeng XL, Zhang YX. Mate location and recognition in *Glenea cantor* (Fabr.)(Coleoptera: Cerambycidae: Lamiinae): roles of host plant health, female sex pheromone, and vision. *Environ Entomol*. 2007; 36: 864–870. PMID: [17716477](#)
11. Milet-Pinheiro P, Ayasse M, Schlindwein C, Dobson HE, Dötterl S. Host location by visual and olfactory floral cues in an oligolectic bee: innate and learned behavior. *Behav Ecol*. 2012; 531–538. doi: [10.1093/beheco/arr219](#)
12. Burger H, Dötterl S, Ayasse M. Host-plant finding and recognition by visual and olfactory floral cues in an oligolectic bee. *Funct Ecol*. 2010; 24: 1234–1240.
13. Fukaya M, Yasui H, Yasuda T, Akino T, Wakamura S. Female orientation to the male in the white-spotted longicorn beetle, *Anoplophora malasiaca* (Thomson)(Coleoptera: Cerambycidae) by visual and olfactory cues. *Appl Entomol Zool*. 2005; 40: 63–68.
14. Hanks LM. Influence of the larval host plant on reproductive strategies of Cerambycid beetles. *Annu Rev Entomol*. 1999; 44: 483–505. PMID: [15012380](#)
15. Ginzel MD, Hanks LM. Contact pheromones as mate recognition cues of four species of longhorned beetles (Coleoptera: Cerambycidae). *J Insect Behav*. 2003; 16: 181–187.
16. He P, Huang JF. Adult behavior of *Anoplophora glabripennis*. *Acta Entomol Sinica*. 1993; 36:51–55 (in Chinese).
17. Li DJ, Tokoro M, Nacashima T. Mechanism of mating action of *Anoplophora glabripennis* Motschulsky. *J Beijing Forestry University*. 1999; 21:33–36 (in Chinese).
18. Wickham JD, Xu Z, Teale SA. Evidence for a female-produced, long range pheromone of *Anoplophora glabripennis* (Coleoptera: Cerambycidae). *Insect Sci*. 2012; 19: 355–371.
19. Zhang A, Oliver JE, Chauhan K, Zhao B, Xia L, Xu ZC. Evidence for contact sex recognition pheromone of the Asian longhorned beetle, *Anoplophora glabripennis* (Coleoptera: Cerambycidae). *Naturwissenschaften*. 2003; 90: 410–413. PMID: [14504784](#)
20. Nehme ME, Keena MA, Zhang A, Baker TC, Hoover K. Attraction of *Anoplophora glabripennis* to male-produced pheromone and plant volatiles. *Environ Entomol*. 2009; 38: 1745–1755. PMID: [20021771](#)
21. Zhang FJ, Jin YJ, Chen HJ, Wu XY. The selectivity mechanism of *Anoplophora glabripennis* on four different species of maple. *Acta Ecologica Sinica*. 2006; 26:870–877 (in Chinese).
22. Jin YJ, Li JQ, Li JG, Luo YQ, Stephen AT. Olfactory response of *Anoplophora glabripennis* to volatile compounds from ash-leaf Maple (*Acer negundo*) under drought stress. *Scientia Silvae Sinicae*. 2004; 40: 99–105 (in Chinese).
23. Haack RA, Hérard F, Sun J, Turgeon JJ. Managing invasive populations of Asian longhorned beetle and citrus longhorned beetle: a worldwide perspective. *Annu Rev Entomol*. 2010; 55: 521–546. doi: [10.1146/annurev-ento-112408-085427](#) PMID: [19743916](#)
24. Hu J, Angeli S, Schuetz S, Luo Y, Hajek AE. Ecology and management of exotic and endemic Asian longhorned beetle *Anoplophora glabripennis*. *Agr Forest Entomol*. 2009; 11: 359–375.
25. Wang ZG. Occurrence of *Anoplophora glabripennis* Motschulsky and control in China. Ph.D. Thesis, Northeast Forestry University of China (in Chinese). 2004.
26. Li HX, Yuan XL, Zhou ZJ, Huang XX, Liu ZG, Zhang X. Study on the habits and control effect of *Anoplophora glabripennis* in the Harbin City. *J Heilongjiang Vocational Institute of Ecological Engineering*. 2008; 21: 23–24 (in Chinese).
27. Gaag DJ, Loomans A. Host plants of *Anoplophora glabripennis*, a review. *EPPO Bulletin*. 2014; 44: 518–528.
28. Smith MT, Bancroft J, Tropp JM. Age-specific fecundity of *Anoplophora glabripennis* (Coleoptera: Cerambycidae) on three tree species infested in the United States. *Environ Entomol*. 2002; 31: 76–83.

29. Keena MA. *Anoplophora glabripennis* (Coleoptera: Cerambycidae) fecundity and longevity under laboratory condition: comparison of populations from New York and Illinois on *Acer saccharum*. *Environ Entomol.* 2002; 31: 490–498.
30. Wang T, Wen JB, Xu ZC. A simple and convenient method used in identifying the sex of *Anoplophora glabripennis* Motschulsky adults. *Forest Pest Disease.* 2004; 5:42–44 (in Chinese).
31. Yasui H, Fujiwara-Tsujii N, Wakamura S. Volatile attractant phytochemicals for a population of white-spotted longicorn beetles *Anoplophora malasiaca* (Thomson) (Coleoptera: Cerambycidae) fed on willow differ from attractants for a population fed on citrus. *Chemoecology.* 2011; 21: 51–58.
32. Yasui H, Akino T, Fukaya M, Wakamura S, Ono H. Sesquiterpene Hydrocarbons: Kairomones with a releaser effect in the sexual communication of the white-spotted longicorn beetle, *Anoplophora malasiaca* (Thomson) (Coleoptera: Cerambycidae). *Chemoecology.* 2008; 18: 233–242.
33. Bahlai CA, Welsman JA, Macleod EC, Schaafsma AW, Hallett RH, Sears MK. Role of visual and olfactory cues from agricultural hedgerows in the orientation behavior of multicolored Asian lady beetle (Coleoptera: Coccinellidae). *Environ Entomol.* 2008; 37: 973–979. PMID: [18801263](#)
34. Wang P, Su J, Ouyang F, Ge F. Orientation behavior of *Propylaea japonica* toward visual and olfactory cues from its prey–host plant combination. *Entomol Exp Appl.* 2015; 155: 162–166.
35. Andersson P, Hamb Ck PA. Immigration of olfactory searching insects into host plant patches: testing scaling rules for olfactory information. *Arthropod-Plant Inte.* 2011; 5: 269–277.
36. Benelli G, Revadi S, Carpita A, Giunti G, Raspi A, Anfora G, et al. Behavioral and electrophysiological responses of the parasitic wasp *Psytalia concolor* (Szépligeti) (Hymenoptera: Braconidae) to *Ceratitis capitata*-induced fruit volatiles. *Biol Control.* 2013; 64: 116–124.
37. IBM SPSS Inc., Boston, Mass, 2012. IBM SPSS Statistics Version 21. IBM Corporation, Armonk, NY. Available: <http://www-01.ibm.com/software/analytics/spss/prod-ucts/statistics/downloads.html>.
38. McIntosh RL, Katinic PJ, Allison JD, Borden JH, Downey DL. Comparative efficacy of five types of trap for woodborers in the Cerambycidae, Buprestidae and Siricidae. *Agr Forest Entomol.* 2001; 3: 113–120.
39. Liu B, Xu HC, Meng JG, Sun JH, Fan JT. Visual cues of the host-finding and mating location of *Mono-chamus alternatus* (Coleoptera: Cerambycidae). *J Zhejiang Agricultural Forest University.* 2012; 29:617–620 (in Chinese).
40. Campell SA, Borden JH. Additive and synergistic integration of multimodal cues of both hosts and non hosts during host selection by woodboring insects. *Oikos.* 2009; 4: 553–563.
41. Schaefer HM, Schaefer V, Levey DJ. How plant–animal interactions signal new insights in communication. *Trends Ecol Evol.* 2004; 19: 577–584.
42. Song B, Niu Y, St Kklin J, Chen G, Peng DL, Gao YQ, et al. Pollinator attraction in *Cornus capitata* (Cornaceae): the relative role of visual and olfactory cues. *J Plant Ecol.* 2015; 8: 173–181.
43. Nehme ME, Keena MA, Zhang A, Baker TC, Xu Z, Hoover K. Evaluating the use of male-produced pheromone components and plant volatiles in two trap designs to monitor *Anoplophora glabripennis*. *Environ Entomol.* 2010; 39: 169–176. PMID: [20146854](#)
44. Meng PS, Trotter RT, Keena MA, Baker TC, Yan S, Schwartzberg EG, et al. Effects of pheromone and plant volatile release rates and ratios on trapping *Anoplophora glabripennis* (Coleoptera: Cerambycidae) in China. *Environ Entomol.* 2014; 43: 1379–1388. PMID: [25259696](#)
45. Raguso RA, Willis MA. Synergy between visual and olfactory cues in nectar feeding by naïve hawk-moths, *Manduca sexta*. *Anim Behav.* 2002; 64: 685–695.
46. Guo J, Guo A. Crossmodal interactions between olfactory and visual learning in *Drosophila*. *Science.* 2005; 309: 307–310. PMID: [16002621](#)
47. Crook DJ, Lance DR, Mastro VC. Identification of a potential third component of the male-produced pheromone of *Anoplophora glabripennis* and its effect on behavior. *J Chem Ecol.* 2014; 40: 1241–1250. doi: [10.1007/s10886-014-0520-3](https://doi.org/10.1007/s10886-014-0520-3) PMID: [25432666](#)
48. Zhang A, Oliver JE, Aldrich JR, Wang B, Mastro VC. Stimulatory beetle volatiles for the Asian long-horned beetle, *Anoplophora glabripennis* (Motschulsky). *Zeitschrift Fur Naturforschung.* 2002; 57: 553–558. PMID: [12132701](#)
49. Mcquate GT. Green light synergistically enhances male sweetpotato weevil response to sex pheromone. *Sci Rep.* 2014; 4: -4499. doi: [10.1038/srep04499](https://doi.org/10.1038/srep04499) PMID: [24675727](#)
